# Supplementary material for: Synthesis, characterization and photophysical properties of some 3,3′-bisindolyl(aryl)methanes
Source: Royal Society of Chemistry journal article supplement (doi:10.1039/c6ra01391k), 2016-01-01
Supplement: c6ra01391k1.pdf [file c6ra01391k1.pdf]

## Supporting Information

### Synthesis, Characterization, and Photophysical Properties of Some 3,3'-bisindolyl(aryl)methanes

Abdollah Neshat

Department of Chemistry, Institute for Advanced Studies in Basic Sciences (IASBS), No. 444, Yousef Sobouti Blvd., P. O. Box  
45195-1159, Zanzan 45137-6731, Iran

E-mail: [a.neshat@iasbs.ac.ir](mailto:a.neshat@iasbs.ac.ir)

**Pages 2-7:**  $^1\text{H}$  NMR spectra of compounds  $\text{L}_1$ - $\text{L}_6$

**Page 8:** HSQC spectrum of  $\text{L}_2$

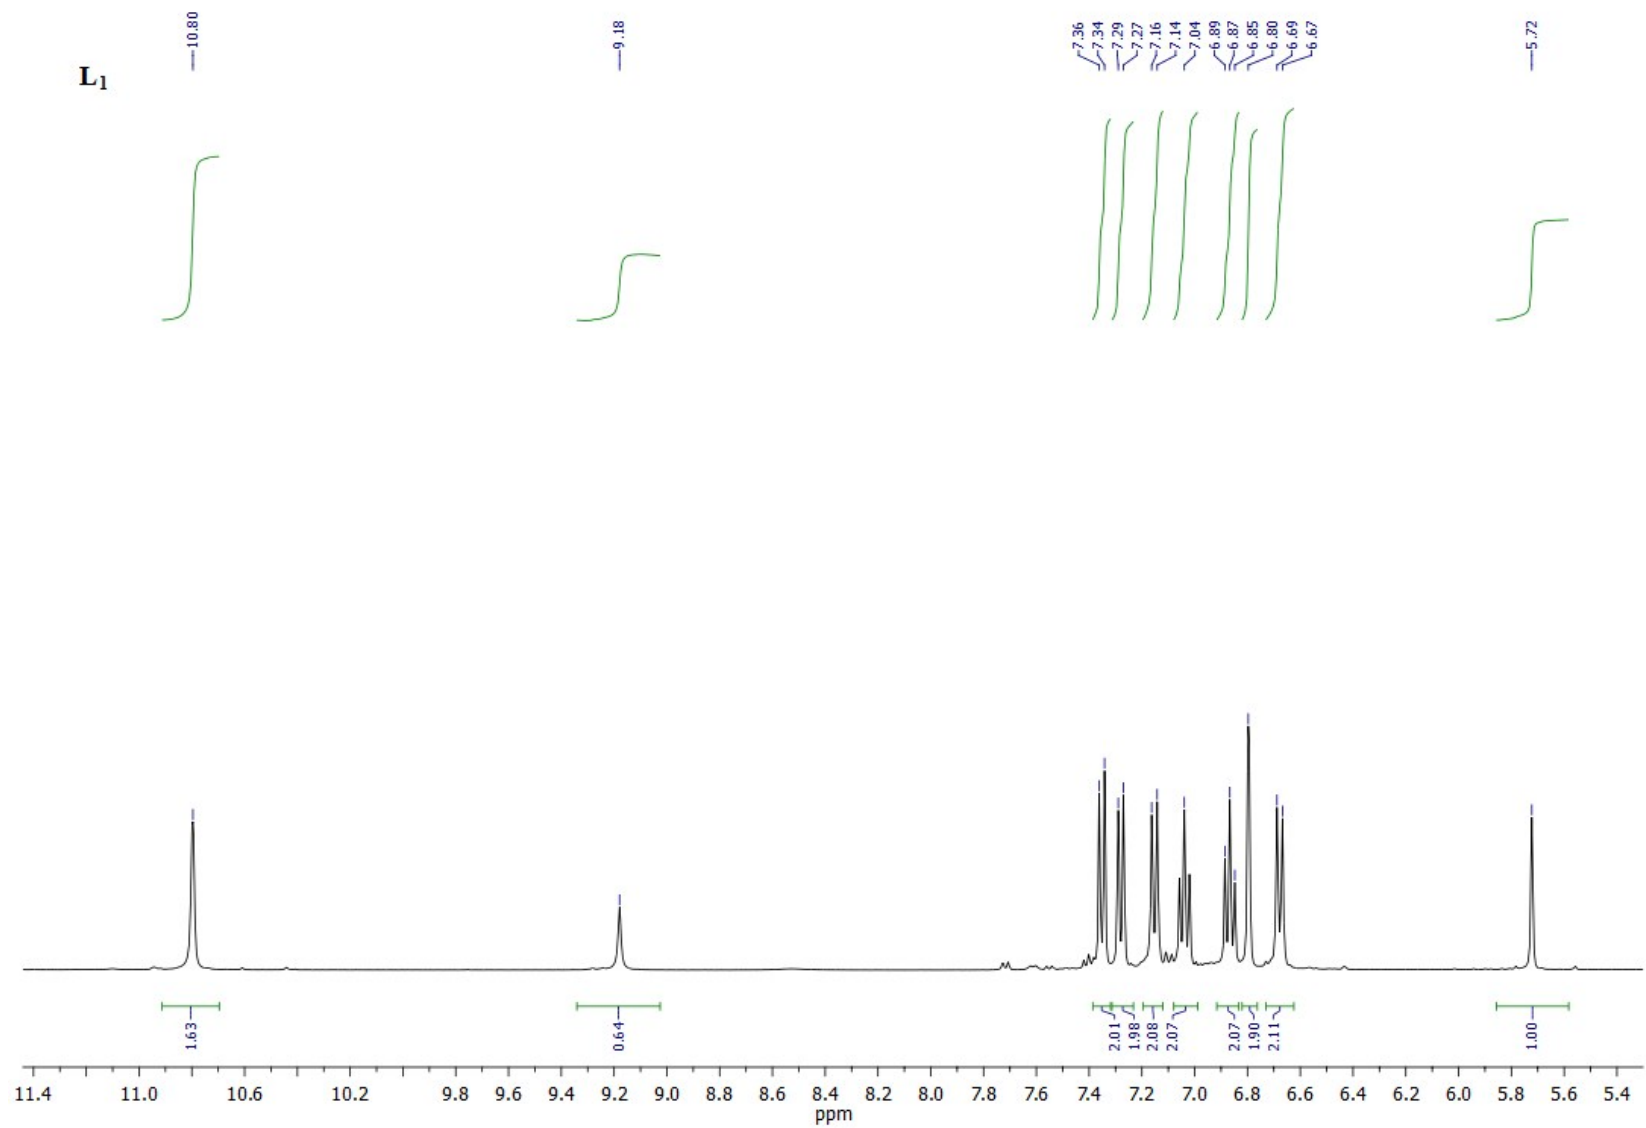

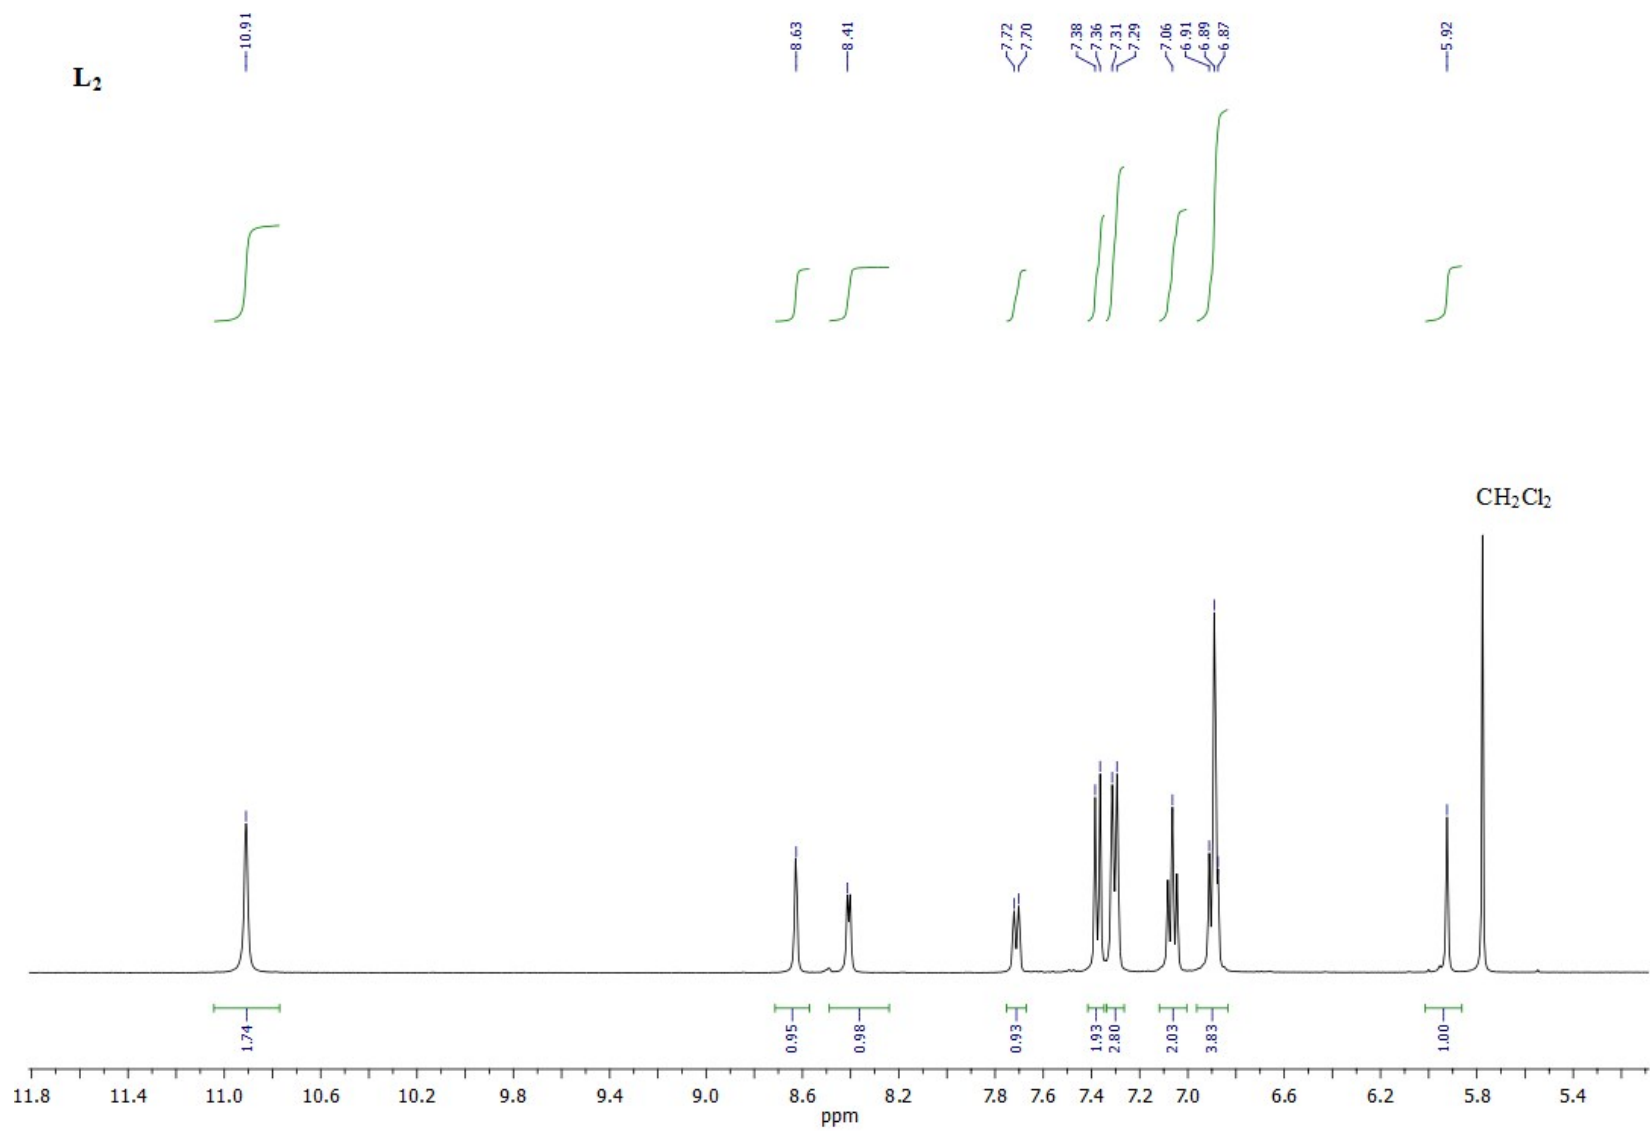

**L<sub>3</sub>**

(Region 7.18 ppm – 7.25 ppm is contaminated with residual Toluene peaks)

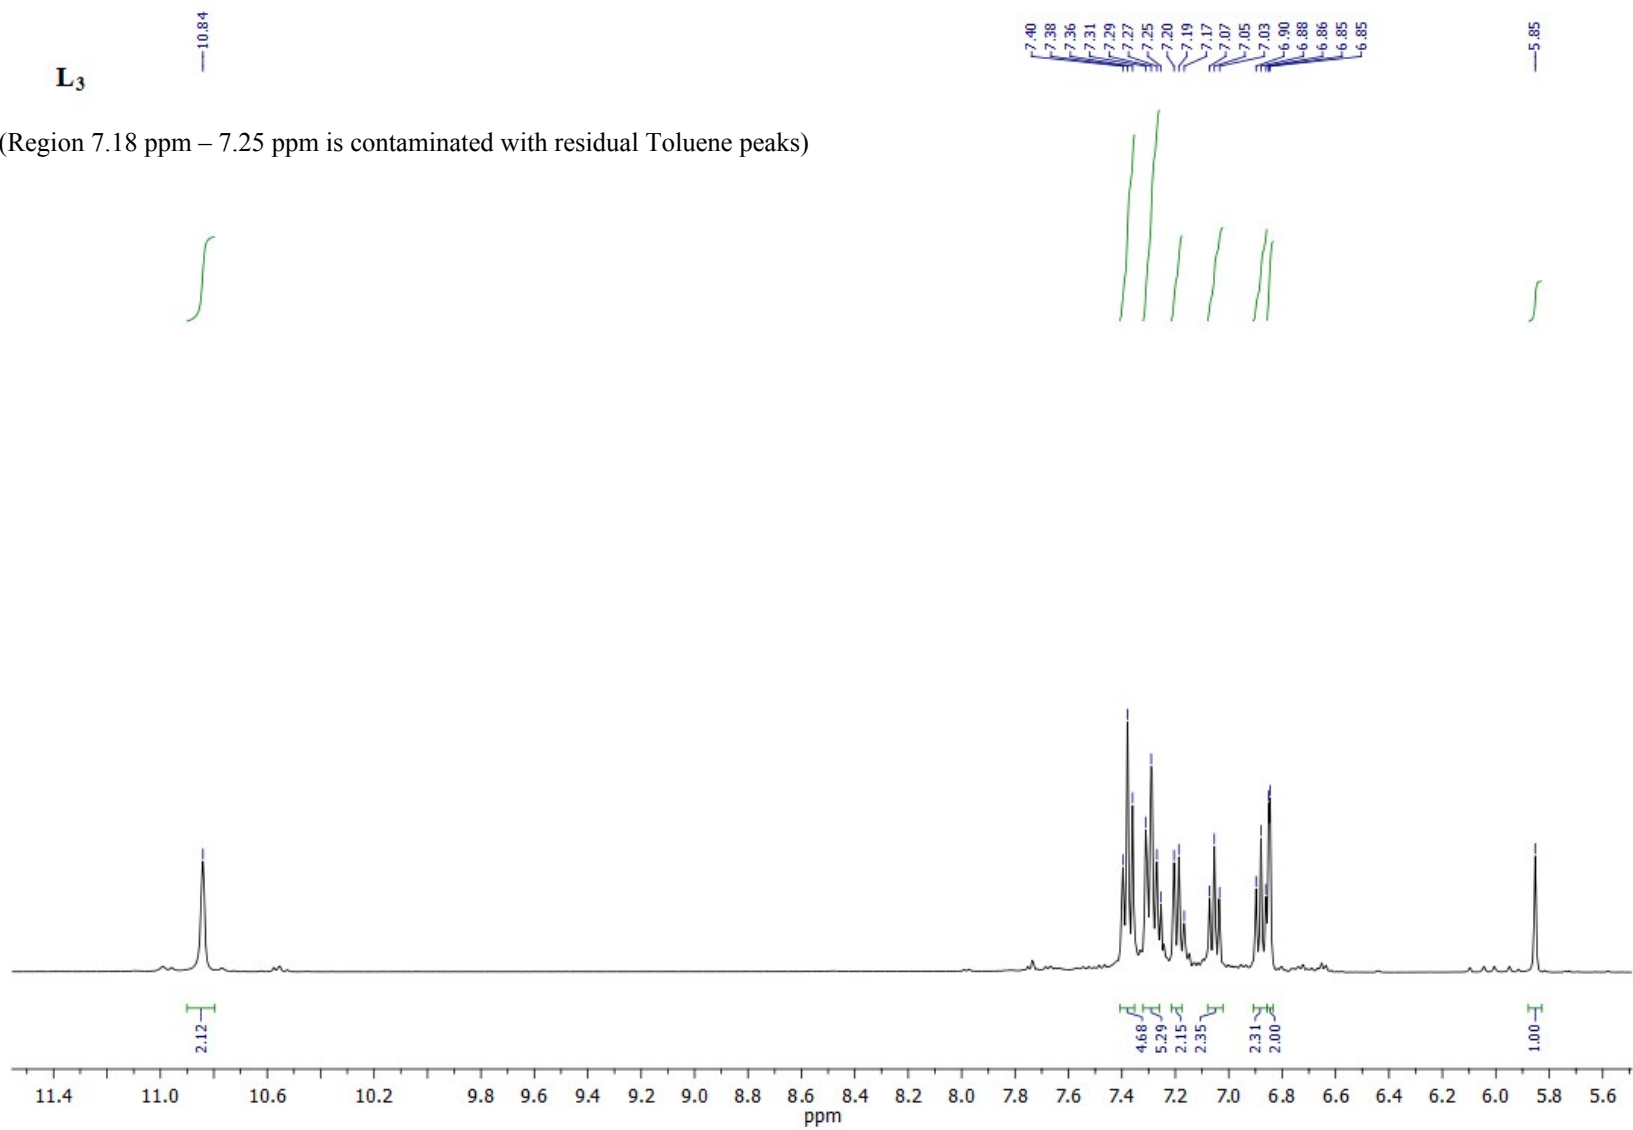

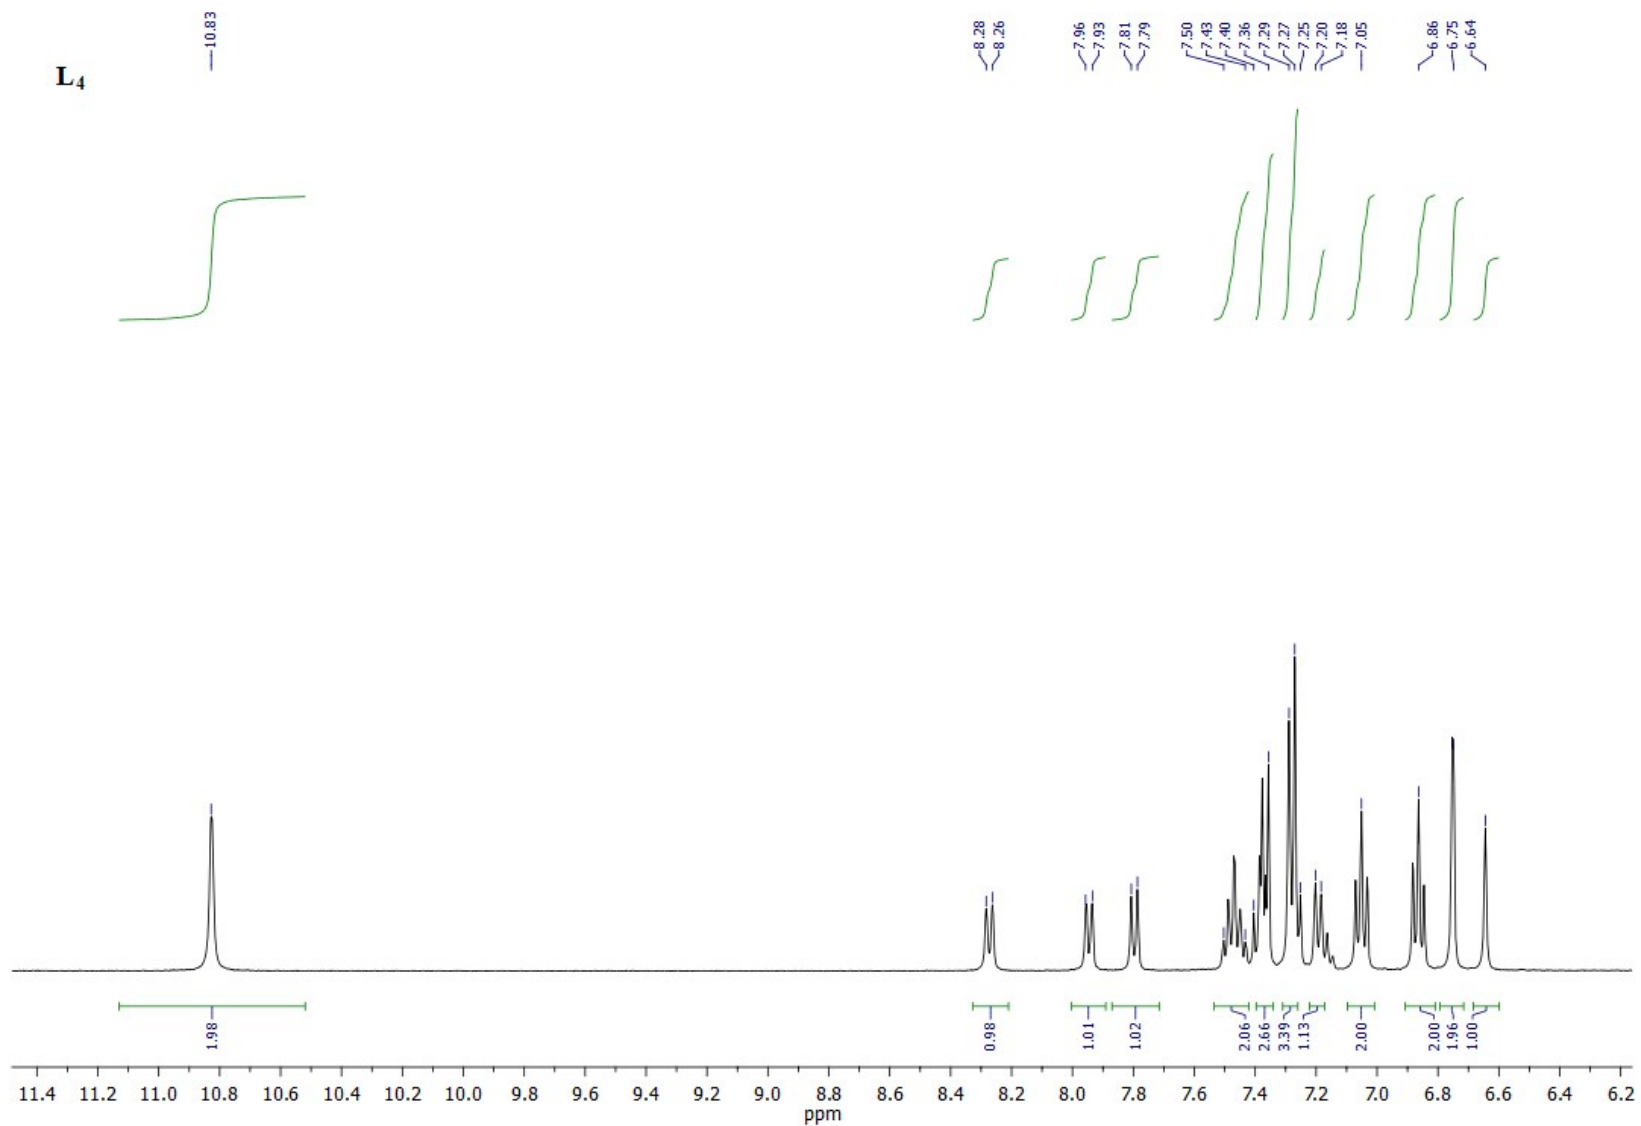

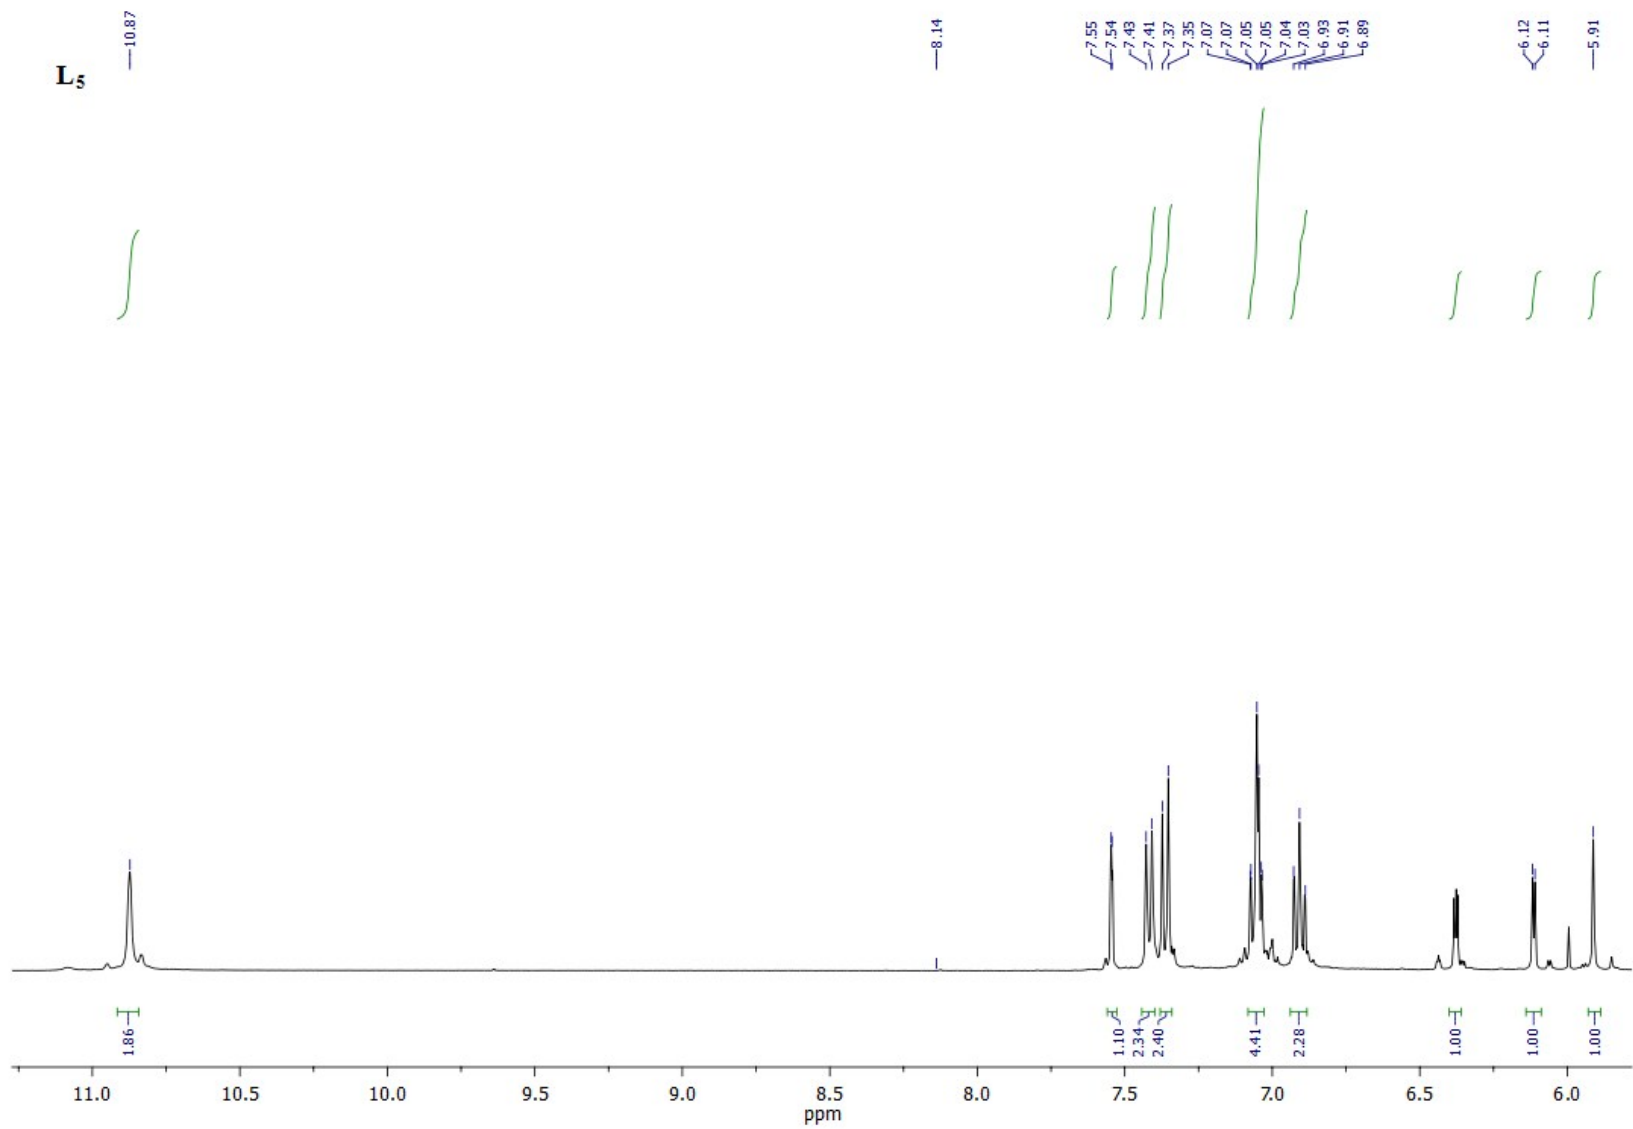

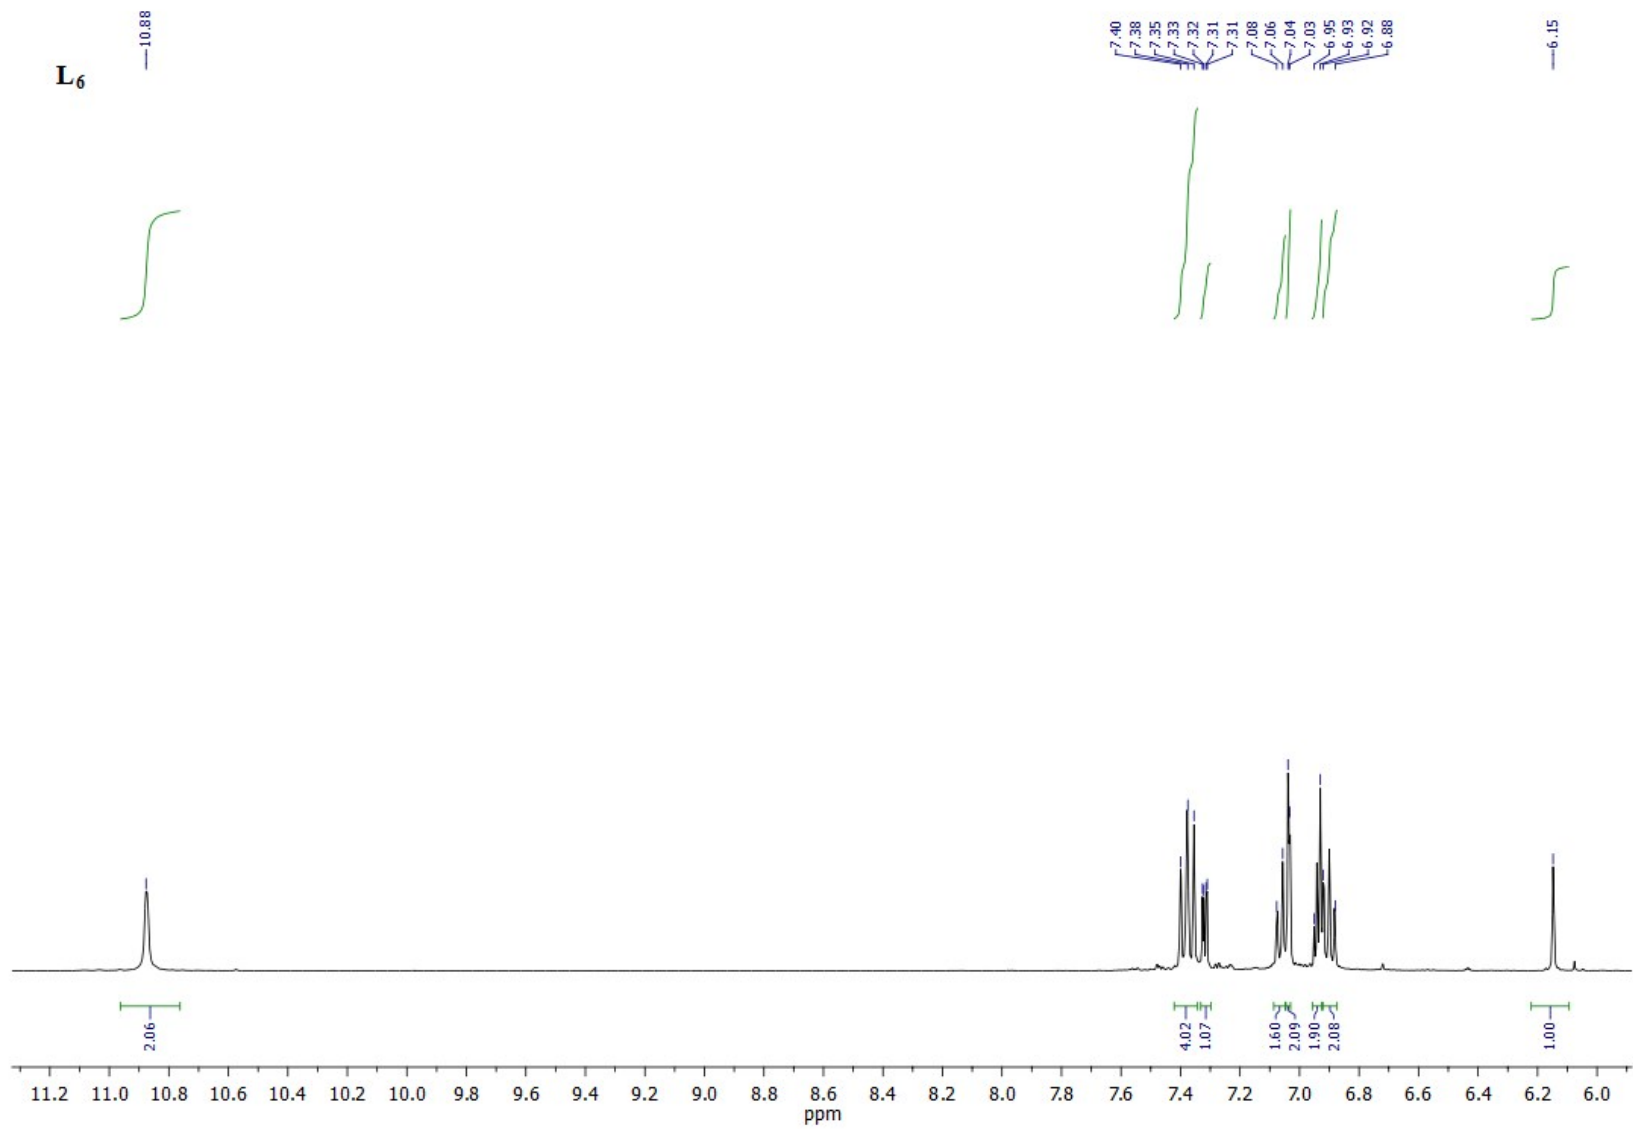

HSQC spectrum of **L<sub>2</sub>**: Signals from coupling between H<sub>1</sub> and H<sub>2</sub> with lowest field *ortho*-carbons to the nitrogen atom on pyridine ring are shown in red circles.

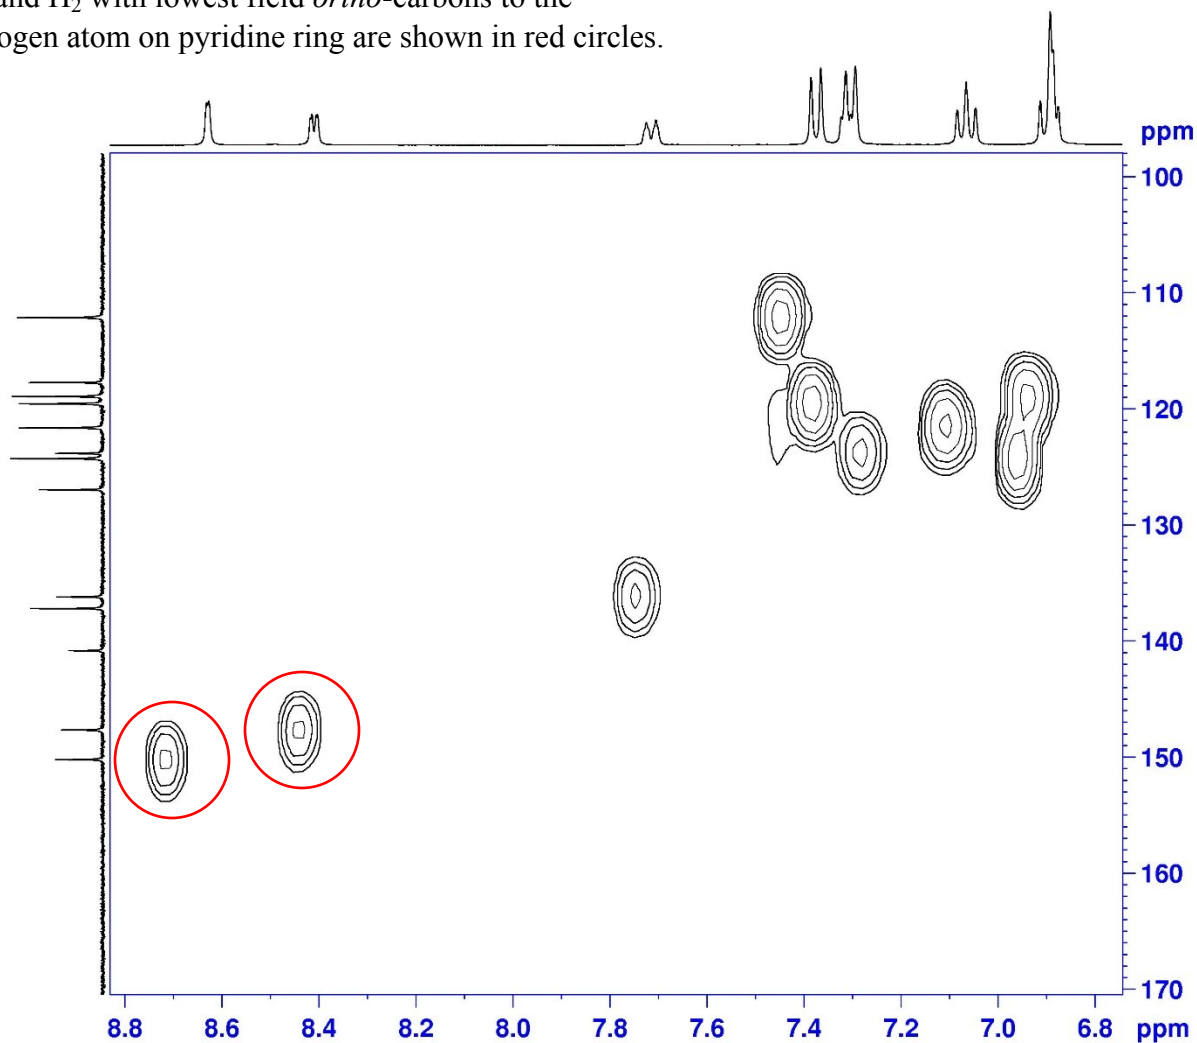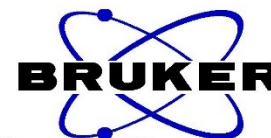

```

NAME      07_nestor
EXPNO     153
PROCNO    1
Date_     20151206
Time      9.34
INSTRUM   spect
PROBHD    5 mm PABBO BB
PULPROG   hsqcetgps12
TD        1024
SOLVENT   DMSO
NS        32
DS        2
SWH       8012.820 Hz
FIDRES    0.925020 Hz
AQ        0.0639476 sec
RG        2050
DW        62.400 usec
DE        6.50 usec
TE        295.5 K
CSTRT2    145.0000000
  
```

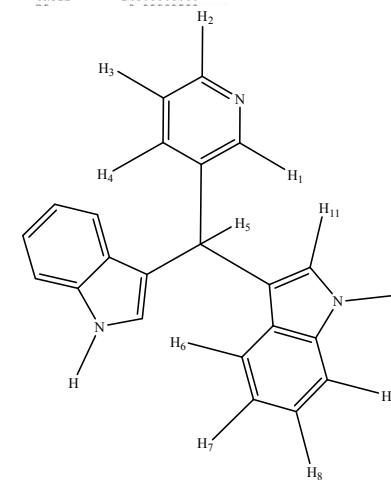

```

P19      600.00 usec
ND0      2
TD       66
SF01     100.6429 MHz
FIDRES    280.917450 Hz
SW        250.000 ppm
P1M0DR    Echo-Antiecho
SI        1024
SF        600.2200000 MHz
W1W       Q5-NS
SFR       2
LB        0.00 Hz
GB        0
PC        1.00
SI        1024
XC2       echo-antiecho
SF        100.6253990 MHz
W1W       Q5-NS
SFR       2
LB        0.00 Hz
GB        0
  
```
